# Supplementary material for: Modification of epoxy resin through the self-assembly of a surfactant-like multi-element flame retardant
Source: Royal Society of Chemistry journal article supplement (doi:10.1039/c5ta07115a), 2016-01-01
Supplement: c5ta07115a1.pdf [file c5ta07115a1.pdf]

## Supplementary Information

### Modification of epoxy resin through the self-assembly of a surfactant like multielement flame retardant

Cheng Liu, Ting Chen, Conghui Yuan, Cunfeng Song, Ying Chang, Guorong Chen, Yiting

Xu and Lizong Dai\*

Fujian Provincial Key Laboratory of Fire Retardant Materials, College of Materials,  
Xiamen University, Xiamen 361005, People's Republic of China

We analyzed the reaction mechanism in detail. Based on the literature<sup>1</sup>, the pathway of the Kabachnik-Fields reaction depends on the nature of the reactants. Generally, the basicity of the amine is the crucial factor that determines the reaction pathway. In this paper, POSS-NH<sub>2</sub> as an aliphatic primary amine, which can nucleophilic interaction of the pre-reaction complex so in this condition the reaction follows the 'hydroxy phosphonate' pathway. As show in Scheme S1, the reaction starts with the addition of a phosphite to formaldehyde to form  $\alpha$ -hydroxyl phosphate **3**, followed the hydroxyl group was replaced by the amino group and release the water molecular, finally the target product was obtained.

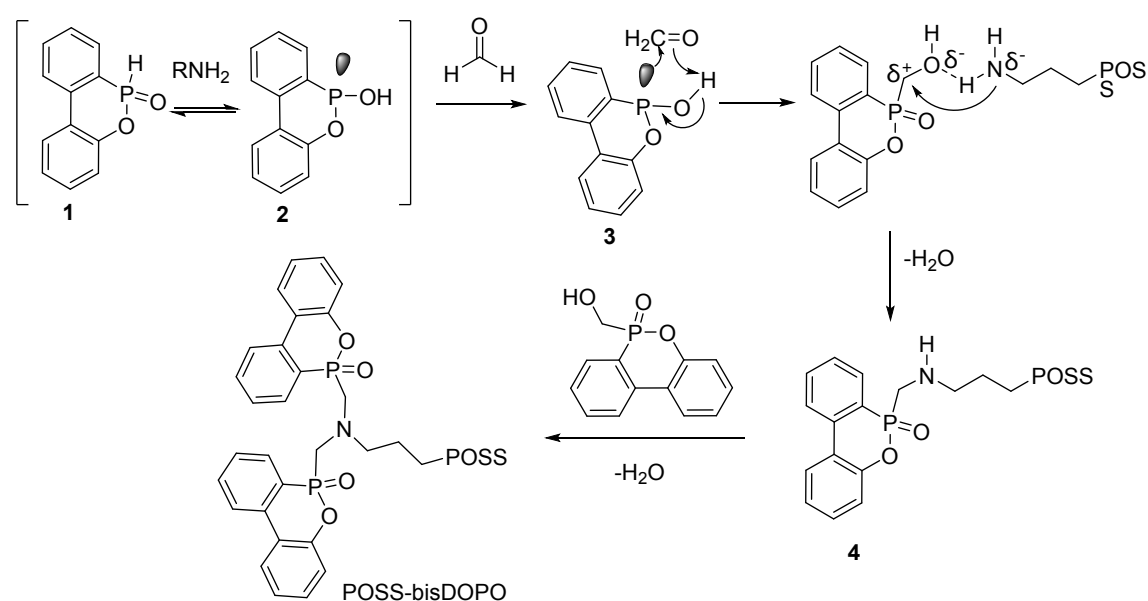

Scheme S1. The proposed mechanism for the synthesis of POSS-bisDOPO.

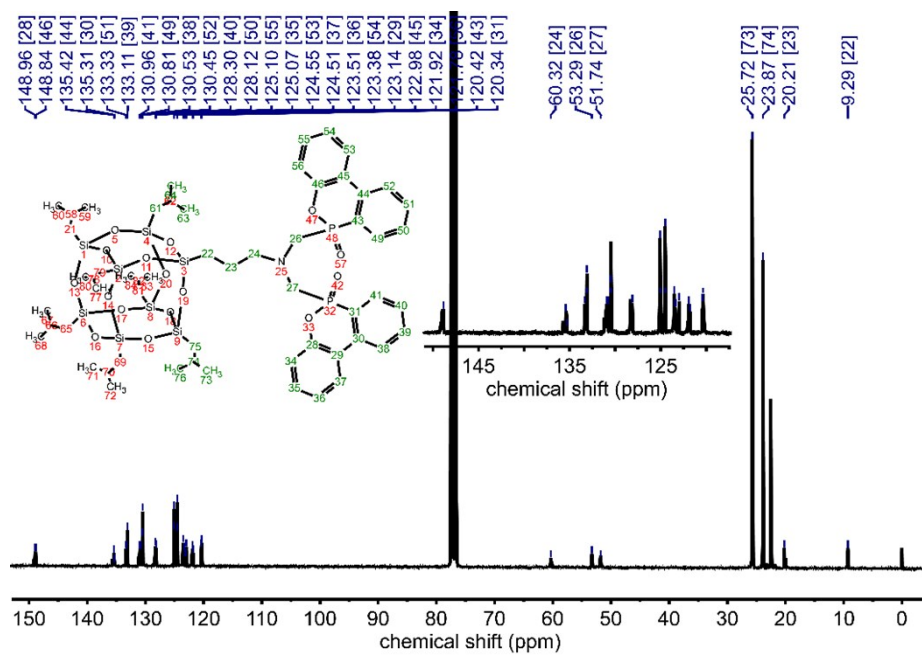

Figure S1.  $^{13}\text{C}$  NMR spectrum for POSS-bisDOPO.

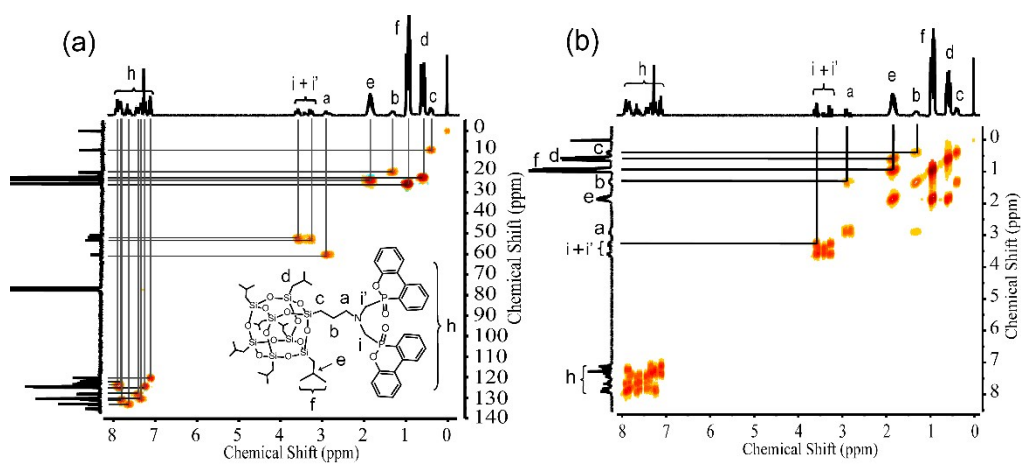

Figure S2. 2D NMR spectra for POSS-bisDOPO.

(a)

**Acquisition Parameter**

|                   |               |              |           |                          |          |
|-------------------|---------------|--------------|-----------|--------------------------|----------|
| Ion Source Type   | ESI           | Ion Polarity | Positive  | Alternating Ion Polarity | off      |
| Mass Range Mode   | Std/Normal    | Scan Begin   | 60 m/z    | Scan End                 | 1800 m/z |
| Capillary Exit    | 156.6 Volt    | Skim 1       | 40.0 Volt | Trap Drive               | 86.5     |
| Accumulation Time | 14701 $\mu$ s | Averages     | 7 Spectra | Auto MS/MS               | off      |

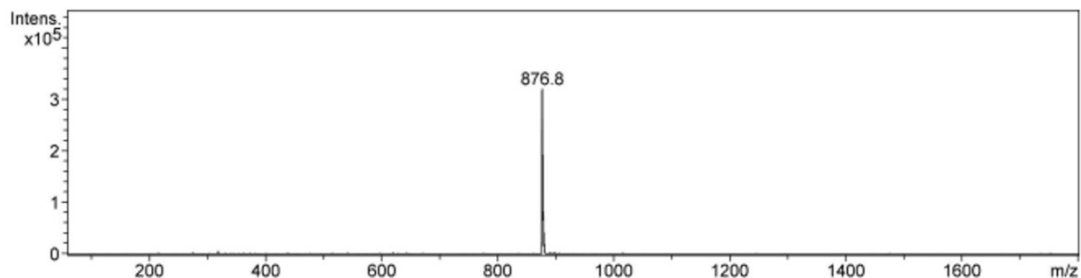

(b)

**Acquisition Parameter**

|                   |               |              |           |                          |          |
|-------------------|---------------|--------------|-----------|--------------------------|----------|
| Ion Source Type   | ESI           | Ion Polarity | Positive  | Alternating Ion Polarity | off      |
| Mass Range Mode   | Std/Normal    | Scan Begin   | 500 m/z   | Scan End                 | 2000 m/z |
| Capillary Exit    | 190.8 Volt    | Skim 1       | 40.0 Volt | Trap Drive               | 122.3    |
| Accumulation Time | 72756 $\mu$ s | Averages     | 7 Spectra | Auto MS/MS               | off      |

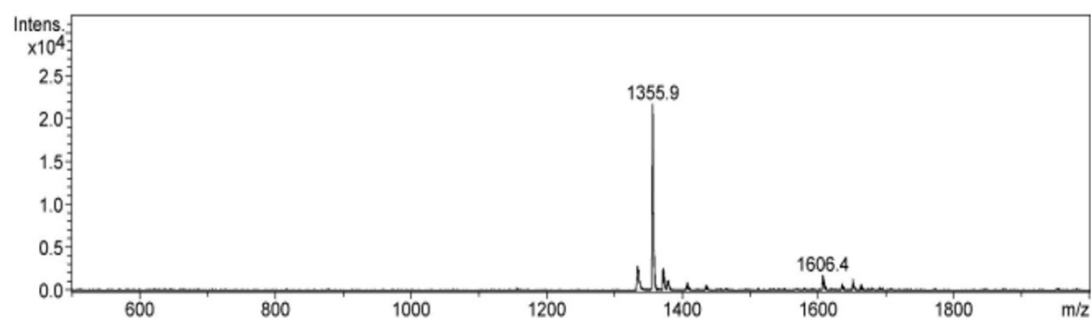

Figure S3. Mass spectra of POSS-NH<sub>2</sub> (a) and POSS-bisDOPO (b).

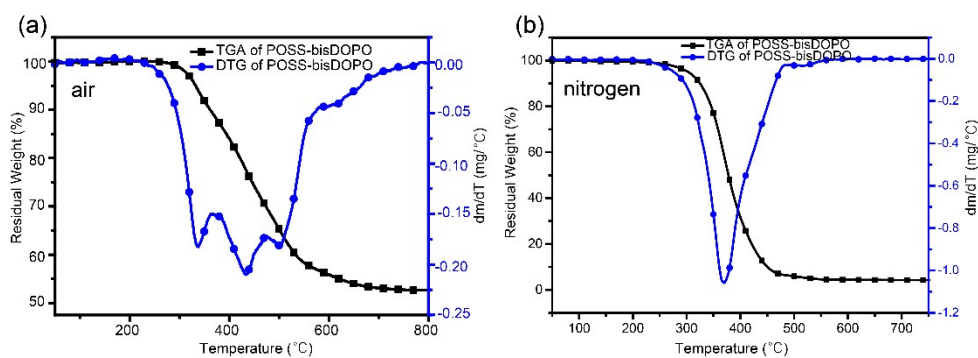

Figure S4. TGA and DTG curves of POSS-bisDOPO under air (a) and under nitrogen (b).

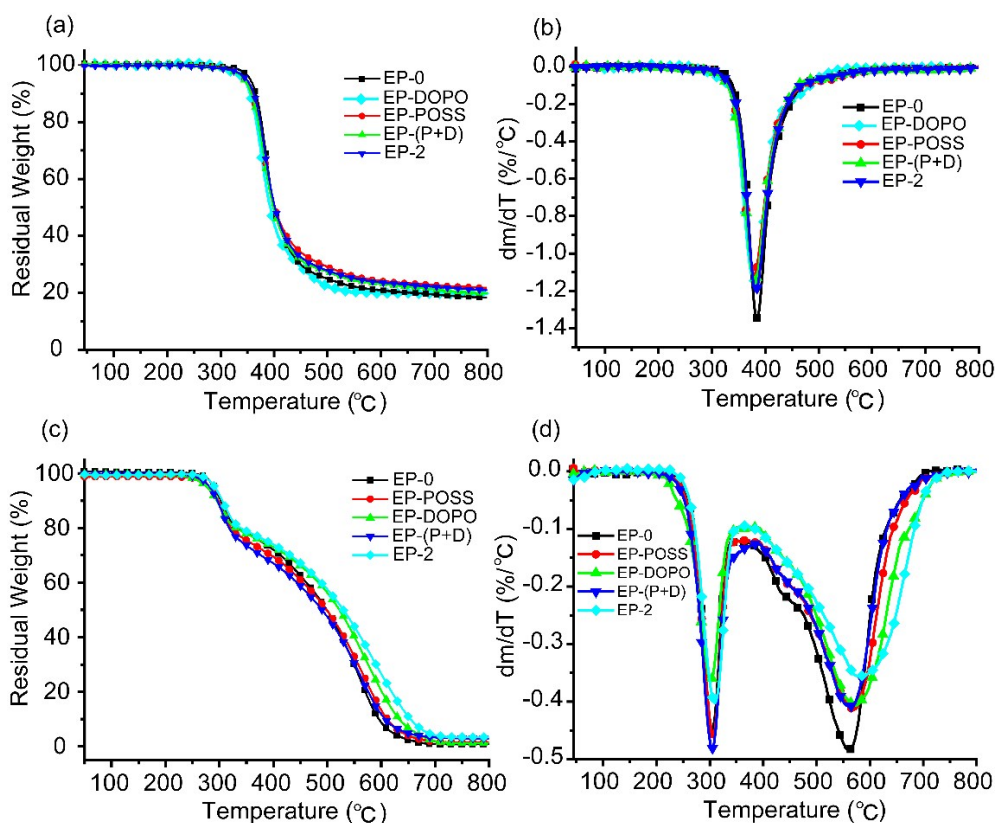

Figure S5. The TGA and DTG curves of control samples (a, b nitrogen atmosphere, c, d air atmosphere, 10 °C min<sup>-1</sup>).

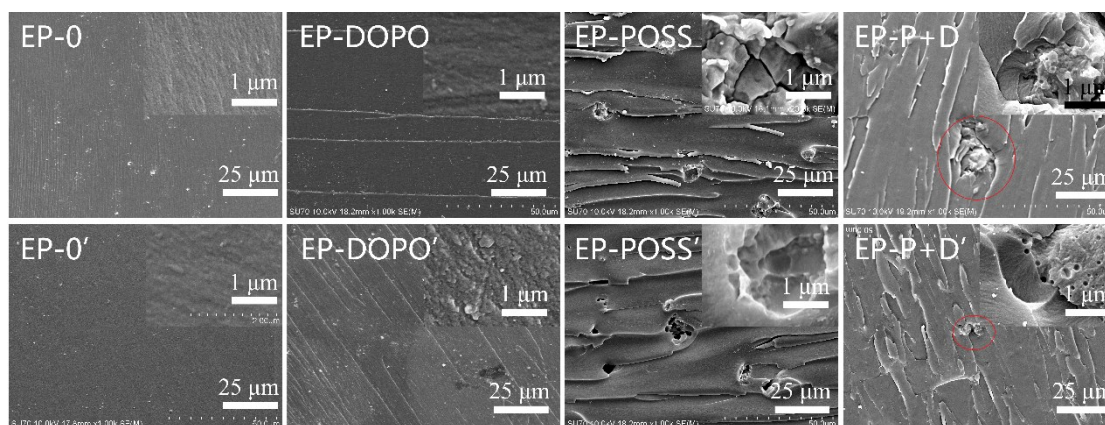

Figure S6. SEM images of fracture surface of Control Samples.

1. R. A. Cherkasov and V. I. Galkin, *Russ. Chem. Rev.*, 1998, 67, 857-882.
